1 **Title:** MmpL3 is the flippase for mycolic acids in mycobacteria

2

3 **Authors:** Zhujun Xu<sup>a</sup>, Giovanna Poce<sup>c</sup>, Shu-Sin Chng<sup>a,b,\*</sup>

4

5 **Affiliations:**

6 <sup>a</sup>Department of Chemistry, National University of Singapore, Singapore 117543.

7 <sup>b</sup>Singapore Center on Environmental Life Sciences Engineering (SCELSE), National  
8 University of Singapore, Singapore 117456.

9 <sup>c</sup>Dipartimento di Chimica e Tecnologie del Farmaco, Sapienza University of Rome, Rome  
10 00185, Italy

11 <sup>\*</sup>To whom correspondence should be addressed. E-mail: [chmchngs@nus.edu.sg](mailto:chmchngs@nus.edu.sg)

12

13 Author contributions: Z.X. and S.-S.C. designed research; Z.X. performed all experiments  
14 described in this work; G.P. synthesized and provided BM212; Z.X., and S.-S.C. analyzed  
15 and discussed data; Z.X., and S.-S.C. wrote the paper.

16

17 The authors declare no conflict of interest.

18

19 **Classification**

20 Biological Sciences - Biochemistry

21

22 **Abstract**

23       The defining feature of the mycobacterial outer membrane (OM) is the presence of  
24 mycolic acids (MAs), which in part render the bilayer extremely hydrophobic and  
25 impermeable to external insults, including many antibiotics. While the biosynthetic pathway  
26 of MAs is well studied, the mechanism(s) by which these lipids are transported across the cell  
27 envelope is(are) much less known. MmpL3, an essential inner membrane (IM) protein, is  
28 implicated in MA transport, but its exact function has not been elucidated. It is believed to be  
29 the cellular target of several anti-mycobacterial compounds; however, evidence for direct  
30 inhibition of MmpL3 activity is also lacking. Here, we establish that MmpL3 is the MA  
31 flippase at the IM of mycobacteria, and show that a 1,5-diarylpyrrole compound, BM212,  
32 directly inhibits this activity. We develop assays that selectively access mycolates on the  
33 surface of *Mycobacterium smegmatis* spheroplasts, allowing us to monitor flipping of MAs  
34 across the IM. Using these assays, we establish the mechanism-of-action of BM212 as an  
35 MmpL3 inhibitor, and employ it as a molecular probe to demonstrate the requirement of  
36 functional MmpL3 for the transport of MAs across the IM. Our work provides fundamental  
37 insights into OM biogenesis and MA transport in mycobacteria. Furthermore, our assays  
38 serve as an important platform for accelerating the validation of small molecules that target  
39 MmpL3, and their development as future anti-tuberculosis drugs.

40

41 **Keywords**

42 *Mycobacterium tuberculosis*; membrane biogenesis; lipid transport; trehalose monomycolate;  
43 Mycobacterial membrane protein Large; Resistance, Nodulation, and Cell Division

44 **Significance statement**

45 Biological membranes define cellular boundaries, allow compartmentalization, and  
46 represent a prerequisite for life; yet, our understanding of membrane biogenesis remains  
47 rudimentary. Mycobacteria, including the human pathogen *Mycobacterium tuberculosis*, are  
48 surrounded by a double-membrane cell envelope that makes them intrinsically resistant to  
49 many antibiotics. Specifically, the outer membrane contains unique lipids called mycolic  
50 acids, whose transport mechanism across the envelope is unknown. In this study, we  
51 established the role of an essential membrane protein as the flippase for mycolic acids, and  
52 demonstrated that this protein is a target of putative anti-tuberculosis compounds. Our work  
53 provides insights into outer membrane biogenesis and lipid transport in mycobacteria, and  
54 also the means to evaluate drugs that disrupt mycolic acid transport at the inner membrane.

55

## 56 **Introduction**

57       The outer membrane (OM) of *Mycobacterium tuberculosis*, the causative agent of  
58 tuberculosis (TB), is distinctively characterized by the abundance of mycolic acids (MAs),  
59 C<sub>60</sub>-C<sub>90</sub> long chain, branched fatty acids, packed together to produce a bilayer with markedly  
60 reduced fluidity and permeability (Brennan & Nikaido, The envelope of mycobacteria, 1995).  
61 These MAs come in the forms of trehalose monomycolates (TMMs), trehalose dimycolates  
62 (TDMs), and mycolates covalently attached to arabinogalactan (AG) polysaccharides, which  
63 are in turn linked to the peptidoglycan and collectively known as the mAGP complex (Fig.  
64 1A). MAs are synthesized at the inner membrane (IM) as TMMs via a highly-conserved and  
65 well-characterized pathway (2), which is the target of first line anti-TB drug, isoniazid (3).  
66 How MAs are transported across the cell envelope and assembled into the OM, however, is  
67 less understood; proteins mediating TMM flipping across the IM and transit across the  
68 periplasm have not been identified and/or characterized (Fig. 1A). At the OM, the Ag85  
69 complex transfers a mycolate chain from one TMM molecule to another to form TDM, or to  
70 the AG polysaccharides to form the mAGP complex (4). Tethering the OM to the cell wall via  
71 the AG polysaccharides further rigidifies the membrane, making it extremely impermeable to  
72 a wide range of compounds, including many antibiotics (1). The OM, and hence MAs, are  
73 essential for mycobacterial growth.

74       Recently, a conserved essential IM protein, MmpL3 (Mycobacterial membrane protein  
75 Large 3), has been implicated in MA transport. Depletion of *mmpL3* in *Mycobacterium*  
76 *smegmatis* results in accumulation of TMMs and reduced formation of TDMs and AG-linked  
77 mycolates (5,6), suggesting an impairment in TMM transport to the OM. Consistent with this,

78 MmpL3, like other MmpL proteins, belongs to the resistance, nodulation, and cell division  
79 (RND) protein superfamily, and is believed to be a proton motive force (pmf)-dependent  
80 transporter (7). Based on its cellular localization, MmpL3 is likely involved in either TMM  
81 flipping across the IM, TMM release from the IM into the periplasm, or both (Fig. 1A). Yet,  
82 its exact role has not been clearly defined, due largely to the lack of functional assays for its  
83 putative transport activity. Treatment of mycobacteria with a few structurally-distinct small  
84 molecule scaffolds, including ethylenediamines (e.g. SQ109) (8), 1,5-diarylpyrroles (e.g.  
85 BM212) (9,10), adamantyl ureas (e.g. AU1235) (5), and others (11,12,13,14,15), result in  
86 similar changes in mycolate species as in *mmpL3* depletion. These compounds inhibit growth,  
87 and select for resistance mutations in *mmpL3*; however, there is limited evidence that they are  
88 direct MmpL3 inhibitors. The lack of activity assays for MmpL3 made it impossible to test  
89 the proposed mechanism of action of these putative inhibitors.

90 Here, we report that MmpL3 is the TMM flippase at the IM. Using a spheroplast model,  
91 we developed assays to monitor IM topology of TMM. We found that 1,5-diarylpyrrole  
92 BM212 inhibits TMM flipping across the IM in wild-type spheroplasts. Furthermore, we  
93 established that specific MmpL3 variants confer resistance against this inhibition, indicating  
94 that MmpL3 is required for flipping TMM across the IM. BM212 does not inhibit the pmf or  
95 membrane potential, suggesting that it directly targets MmpL3. Our work represents the first  
96 demonstration of lipid transport activity of a key member of the MmpL protein family, and  
97 highlights the importance of using small molecule probes to interrogate protein function. Our  
98 assays have great utility in the validation and development of MmpL3-targeting small  
99 molecules as future anti-TB drugs.

100 **Results**

101

102 **Spheroplasts serve as a viable system to monitor TMM topology**

103 To develop a functional assay for TMM flipping across the IM, we sought a system  
104 where TMM topology in the IM can be monitored. Mycobacterial spheroplasts are ideal for  
105 this purpose because they lack the OM and cell wall, providing easy access to  
106 molecules-of-interest at the IM. Due to the loss of periplasmic contents upon the formation of  
107 spheroplasts, we also expect the transport pathway(s) for TMM to the OM to be disrupted,  
108 thereby resulting in accumulation of TMM at the IM. *M. smegmatis* spheroplasts were  
109 successfully generated via sequential treatment with glycine and lysozyme (Fig. S1), as  
110 previously reported (16). To examine whether MA synthesis is intact in spheroplasts, we  
111 profiled newly-synthesized lipids metabolically labeled with [<sup>14</sup>C]-acetate. Thin layer  
112 chromatographic (TLC) analysis of lipids extracted from whole cells revealed two major  
113 species whose syntheses are inhibited by isoniazid, indicating that these are mycolate-based  
114 lipids (Fig. 1B). We assigned these species as TDM and TMM on the bases of reported  
115 retention factors of these lipids on TLC plates developed under the same solvent system (17).  
116 We showed that mycolates are still produced in *M. smegmatis* spheroplasts; however, the  
117 extracted lipids only contain TMM, but not TDM, consistent with the lack of TMM transport  
118 to the OM, where TDM synthesis occurs. Given the extreme hydrophobicity of mycolates,  
119 we conclude that newly-synthesized TMMs accumulate in the IM of spheroplasts, thus  
120 establishing a platform for monitoring TMM flipping across the bilayer.

121

122 **TMMs accumulated in spheroplasts reside in the outer leaflet of the IM**

123 We next examined whether newly-synthesized TMMs accumulated in the inner or outer  
124 leaflet of the IM in spheroplasts, by monitoring its accessibility to degradation by  
125 recombinant LysB, a lipolytic enzyme. LysB is a mycobacteriophage-encoded esterase that is  
126 specific for mycolates and plays the role of an endolysin important for the release of phage  
127 particles from infected cells (18,19). Substantial amounts of newly-synthesized TMMs in  
128 spheroplasts are readily and specifically hydrolyzed by purified LysB with the concomitant  
129 release of MAs (Fig. 2A). This suggests that newly-synthesized TMMs are accessible on the  
130 surface. We showed that an inactive LysB variant does not result in the same effect. In  
131 addition, we demonstrated that LysB does not enter spheroplasts, nor does it induce cell lysis  
132 compared to controls (Fig. 2B). Taken together, these results establish that the majority of  
133 newly-synthesized TMMs have been translocated across the IM in spheroplasts, and therefore  
134 reside in the outer leaflet of the membrane.

135

136 **MmpL3 is responsible for flipping TMM across the IM**

137 Several compounds, including SQ109, BM212 and AU1235, are believed to affect  
138 MmpL3-mediated TMM transport because mutations in *mmpL3* confer resistance against  
139 these small molecules (5,8,9). While it is not yet clear if these compounds directly inhibit  
140 MmpL3, they may be useful as probes to determine if MmpL3 is responsible for TMM  
141 flipping across the IM. Specifically, we asked whether these small molecules are able to  
142 inhibit TMM flipping in wild-type spheroplasts, and whether they would become less  
143 effective in doing so in spheroplasts expressing MmpL3 variants that confer resistance

144 against them. We first tested the effects of these compounds in our LysB assay in wild-type  
145 spheroplasts. Remarkably, BM212 and AU1235 are able to reduce LysB-mediated hydrolysis  
146 of newly-synthesized TMMs in *M. smegmatis* spheroplasts (Fig. 3A and C), at concentrations  
147 2x and 4x above their reported minimal inhibitory concentrations (MICs) (Table S1) (5,9). In  
148 contrast, SQ109 has no effect (Fig. 3B and C). We showed that the effects of BM212 and  
149 AU1235 are not due to direct inhibition of LysB activity, since TMMs are still hydrolyzed in  
150 detergent-solubilized samples (Fig. S2). Instead, significant amounts of newly-synthesized  
151 TMMs are no longer accessible to LysB in the presence of either compound, indicating  
152 inhibition of TMM flipping across the IM. As an alternative method to assess TMM topology  
153 in the IM and the effects of these drugs, we also examined the ability of  
154 membrane-impermeable fluorophore-conjugated streptavidin to bind to newly-synthesized  
155 TMMs engineered to contain biotin (TMM-biotin) (Fig. 4A). Here, we metabolically labelled  
156 TMMs with 6-azido-trehalose (20), which allowed us to covalently attach an  
157 alkyne-containing biotin probe to TMM via the bio-orthogonal click reaction (21). In  
158 wild-type spheroplasts, TMM-biotin can be detected on the surface, indicating that  
159 6-azido-TMMs have been translocated across the IM (Fig. 4C). We demonstrated that both  
160 BM212 and AU1235 drastically reduce the amounts of 6-azido-TMMs, and hence  
161 TMM-biotin, that can be labelled with streptavidin (Fig. 4D and E). Consistent with the LysB  
162 accessibility assay, these results establish that BM212 and AU1235 inhibit TMM flipping  
163 across the IM.

164 To establish whether MmpL3 is responsible for flipping TMM across the IM, we  
165 employed specific MmpL3 variants that render *M. smegmatis* cells less sensitive to BM212,



166 and tested if TMM flipping in spheroplasts expressing these variants would be more resistant  
167 to the effects of BM212. The growth of cells expressing MmpL3<sub>V197M</sub> or MmpL3<sub>A326T</sub>  
168 variants is only fully inhibited in the presence of 4-8 times the concentration of BM212 that  
169 inhibits wild-type growth (Table S1) (9). In wild-type spheroplasts, we showed that BM212  
170 inhibits TMM flipping in a dose-dependent manner (Fig. 5A and D). We further demonstrated  
171 that BM212 is less effective at reducing LysB accessibility to TMM in spheroplasts  
172 expressing MmpL3<sub>V197M</sub> or MmpL3<sub>A326T</sub> variants (Fig. 5B, C and D). In fact, BM212 is also  
173 unable to inhibit the display of 6-azido TMMs on the surface of spheroplasts expressing  
174 MmpL3<sub>V197M</sub> (Fig. 5E, F and G). Since TMM is only accessible on the outer leaflet of the IM  
175 in the presence of functional MmpL3 (i.e. not inhibited by BM212), we conclude that  
176 MmpL3 is the TMM flippase.

177

### 178 **BM212 directly inhibits MmpL3 function**

179 MmpL3 function is believed to require the pmf, specifically the proton gradient (7).  
180 Consistently, we showed that proton gradient uncouplers, such as CCCP and nigericin (Fig.  
181 3), but not membrane potential disruptors, such as valinomycin-K<sup>+</sup> (Fig. S3), can inhibit  
182 LysB accessibility to TMMs in spheroplasts. Whether BM212 inhibits TMM flipping by  
183 directly targeting MmpL3 is not clear. Contrary to previous reports (22), we did not observe  
184 effects on the proton gradient (Table S2) nor the membrane potential (Fig. S5) in spheroplasts  
185 treated with BM212, at concentrations that inhibited TMM flipping. Furthermore, mutations  
186 in *mmpL3* that confer resistance to BM212 cluster in a specific region when mapped onto a  
187 structural model of MmpL3 (Fig. 6), revealing a possible binding site. We therefore believe

188 that BM212 inhibits TMM flipping across the IM by binding MmpL3 directly.

189

## 190 **Discussion**

191 How the mycobacterial OM is assembled is not well understood. Many members of the  
192 MmpL protein family are believed to be transporters that contribute to the assembly of  
193 various OM lipids (23,24,25,26); however, their specific roles have not been clearly defined.  
194 MmpL3 is the only member of this family essential for growth (5,6,7). Using two  
195 independent assays that allow determination of TMM topology in the IM of mycobacterial  
196 spheroplasts, and employing putative inhibitors as molecular probes to modulate protein  
197 function, we have provided strong biochemical evidence that establish MmpL3 as the TMM  
198 flippase. Whether MmpL3 is the only protein mediating TMM flipping, or whether it is also  
199 involved in TMM release from the IM is not clear (Fig. 1A). One can posit that a second yet  
200 identified protein may be necessary for extracting TMM from the IM and handing it to a  
201 putative chaperone. This scenario would be comparable to the transport of lipoproteins across  
202 the cell envelope in Gram-negative bacteria (27). Alternatively, this step may also be  
203 mediated by MmpL3, in which case, flipping and release of TMM might be coupled; this  
204 would suggest MmpL3 could interact with the putative chaperone. Extending from this idea,  
205 a third scenario may be possible where TMM flipping and release are essentially one single  
206 step in a mechanism similar to RND efflux pumps, whereby TMM never really resides in the  
207 outer leaflet of the IM. This latter model is, however, less like since we have been able to  
208 decouple these steps by observing TMM translocation across the IM in our spheroplasts,  
209 which are effectively devoid of any putative chaperones. Moreover, despite being in the same

210 RND protein superfamily, the structure of MmpL3 differs substantially from canonical RND  
211 efflux pumps (28). MmpL3 does form trimers like RND pumps (29), but the periplasmic  
212 domains of MmpL3 are much smaller (28), and it contains a large C-terminal cytoplasmic  
213 domain. Therefore, MmpL3 may not export TMM via an efflux mechanism. Further  
214 characterization of this system would be necessary to tease apart these models.

215 TB is one of the leading causes of death by infectious disease, and remains a major  
216 health problem worldwide (30). With the rapid emergence of multi- and extensive-drug  
217 resistant (MDR/XDR) TB, there is an urgent need to develop anti-TB drugs with novel  
218 mechanisms-of-action. In this regard, drugs inhibiting MmpL3, which has been shown to be  
219 an ideal target (31), would be especially important. While many small molecules are thought  
220 to inhibit MmpL3, it is puzzling how molecules with different molecular scaffolds may bind  
221 and target the same protein. We have now developed assays that measure the topology of  
222 TMM in the IM of mycobacterial spheroplasts, allowing the validation of true MmpL3  
223 inhibitors. As a start, we have established that BM212 directly inhibits MmpL3 function.  
224 Furthermore, we have shown that SQ109, a molecule that has reached (but failed) phase II  
225 clinical trials, does not actually inhibit TMM flipping. In fact, it is likely that many of these  
226 molecules do not inhibit MmpL3, and have other targets, as has been shown for  
227 tetrahydropyrazo[1,5-*a*]pyrimidine-3-carboxamides (32). Our assays will help to select and  
228 advance small molecules currently under development as MmpL3-targeting drugs.

229

230 **Materials and Methods**

231 Detailed methods can be found in *SI Appendix, Materials and Methods*.

232

233 **Acknowledgments**

234 We thank Graham Hatfull (U Pittsburgh) for providing the pLAM3 plasmid for LysB  
235 overexpression, and Derek Lin (NUS) for constructing the inactive LysB<sub>S82A</sub> variant. We are  
236 grateful to Benjamin Swarts (Central Michigan U) for his generous gift of 6-azido-trehalose.

237 We also thank Eric Rubin (Harvard School of Public Health) for providing strains, and for  
238 critical discussion and comments on the manuscript. We acknowledge Jasmine Chen  
239 (Mechanobiology Institute) for help with microscopy. This work was supported by the  
240 National University of Singapore Start-up funding, the Singapore Ministry of Education  
241 Academic Research Fund Tier 1 and Tier 2 (MOE2014-T2-1-042) grants (to S.-S.C.).

242

243

## 244 References

1. Brennan, P. J. & Nikaido, H. (1995) The envelope of mycobacteria. *Annual Review of Biochemistry* 64(1):29-63.
2. Takayama, K., Wang, C. & Besra, G. S. (2005) Pathway to synthesis and processing of mycolic acids in *Mycobacterium tuberculosis*. *Clinical Microbiology Reviews* 18(1):81-101.
3. Banerjee, A. *et al.* (1994) *inhA*, a gene encoding a target for isoniazid and ethionamide in *Mycobacterium tuberculosis*. *Science* 263:227-229.
4. Jackson, M. *et al.* (1999) Inactivation of the antigen 85C gene profoundly affects the mycolate content and alters the permeability of the *Mycobacterium tuberculosis* cell envelope. *Molecular Microbiology* 31(5):1573-1587.
5. Grzegorzewicz, A. E. *et al.* (2012) Inhibition of mycolic acid transport across the *Mycobacterium tuberculosis* plasma membrane. *Nature Chemical Biology* 8(4):334-341.
6. Varela, C. *et al.* (2012) *MmpL* genes are associated with mycolic acid metabolism in mycobacteria and corynebacteria. *Chemistry & Biology* 19(4):498-506.
7. Domenech, P., Reed, M. B. & Barry, C. E. (2005) Contribution of the *Mycobacterium tuberculosis* *MmpL* protein family to virulence and drug resistance. *Infection and Immunity* 73(6):3492-3501.
8. Tahlan, K. *et al.* (2012) SQ109 targets *MmpL3*, a membrane transporter of trehalose monomycolate involved in mycolic acid donation to the cell wall core of *Mycobacterium tuberculosis*. *Antimicrobial Agents and Chemotherapy* 56(4):1797-1809.

9. La Rosa, V. *et al.* (2012) MmpL3 is the cellular target of the antitubercular pyrrole derivative BM212. *Antimicrobial Agents and Chemotherapy* 56(1):324-331.
10. Poce, G. *et al.* (2013) Improved BM212 MmpL3 inhibitor analogue shows efficacy in acute murine model of tuberculosis infection. *PLoS One* 8(2):e56980.
11. Stanley, S. A. *et al.* (2012) Identification of novel inhibitors of *M. tuberculosis* growth using whole cell based high-throughput screening. *ACS Chemical Biology* 7(8):1377-1384.
12. Remuiñán, M. J. *et al.* (2013) Tetrahydropyrazolo [1, 5-a] pyrimidine-3-carboxamide and N-benzyl-6', 7'-dihydrospiro [piperidine-4, 4'-thieno [3, 2-c] pyran] analogues with bactericidal efficacy against *Mycobacterium tuberculosis* targeting MmpL3. *PLOS One* 8(4):e60933.
13. Rao, S. P. S. *et al.* (2013) Indolcarboxamide is a preclinical candidate for treating multidrug-resistant tuberculosis. *Science Translational Medicine* 5(214):214ra168.
14. Lun, S. *et al.* (2013) Indoleamides are active against drug-resistant *Mycobacterium tuberculosis*. *Nature Communications* 4:2907.
15. Dupont, C. *et al.* (2016) A new piperidinol derivative targeting mycolic acid transport in *Mycobacterium abscessus*. *Molecular Microbiology* 101(3):515-529.
16. Dhiman, R. K. *et al.* (2011) Lipoarabinomannan localization and abundance during growth of *Mycobacterium smegmatis*. *Journal of Bacteriology* 193(20):5802-5809.
17. Bansal-Mutalik, R. & Nikaido, H. (2014) *Mycobacterial* outer membrane is a lipid bilayer and the inner membrane is unusually rich in diacyl phosphatidylinositol dimannosides.

- Proceedings of the National Academy of Sciences* 111(13):4958-4963.
18. Payne, K. M. & Hatfull, G. F. (2012) Mycobacteriophage endolysins: diverse and modular enzymes with multiple catalytic activities. *PLoS One* 7(3):e34052.
  19. Gil, F. *et al.* (2010) Mycobacteriophage Ms6 LysB specifically targets the outer membrane of *Mycobacterium smegmatis*. *Microbiology* 156(5):1497-1504.
  20. Swarts, B. M. *et al.* (2012) Probing the mycobacterial trehalome with bioorthogonal chemistry. *Journal of the American Chemical Society* 134(39):16123-16126.
  21. Jewett, J. C., Sletten, E. M. & Bertozzi, C. R. (2010) Rapid Cu-free click chemistry with readily synthesized biarylazacyclooctynones. *Journal of the American Chemical Society* 132(11):3688-3690.
  22. Li, W. *et al.* (2014) Novel insights into the mechanism of inhibition of MmpL3, a target of multiple pharmacophores in *Mycobacterium tuberculosis*. *Antimicrobial Agents and Chemotherapy* 58(11):6413-6423.
  23. Converse, S. E. *et al.* (2003) MmpL8 is required for sulfolipid-1 biosynthesis and *Mycobacterium tuberculosis* virulence. *Proceedings of the National Academy of Sciences* 100(10):6121-6126.
  24. Jain, M. & Cox, J. S. (2005) Interaction between polyketide synthase and transporter suggests coupled synthesis and export of virulence lipid in *M. tuberculosis*. *PLoS Pathogen* 1(1):e2.
  25. Pacheco, S. A., Hsu, F.-F., Powers, K. M. & Purdy, G. E. (2013) MmpL11 protein transports mycolic acid-containing lipids to the mycobacterial cell wall and contributes to

- biofilm formation in *Mycobacterium smegmatis*. *Journal of Biological Chemistry* 288(33):24213-24222.
26. Belardinelli, J. M. *et al.* (2014) Biosynthesis and translocation of unsulfated acyltrehaloses in *Mycobacterium tuberculosis*. *Journal of Biological Chemistry* 289(40):27952-27965.
27. Okuda, S. & Tokuda, H. (2011) Lipoprotein sorting in bacteria. *Annual Review of Microbiology* 65:239-259.
28. Chim, N. *et al.* (2015) The Structure and interactions of periplasmic domains of crucial MmpL membrane proteins from *Mycobacterium tuberculosis*. *Chemistry & Biology* 22(8):1098-1107.
29. Belardinelli, J. M. *et al.* (2016) Structure--Function Profile of MmpL3, the Essential Mycolic Acid Transporter from *Mycobacterium tuberculosis*. *ACS Infectious Diseases* 2(10):702-713.
30. Global actions and investments fall far short of those needed to end the global TB epidemic: WHO report 2016. *World Health Organization, Geneva (WHO/HTM/TB/2016.13)*.
31. Li, W. *et al.* (2016) Therapeutic potential of the *Mycobacterium tuberculosis* mycolic acid transporter, MmpL3. *Antimicrobial Agents and Chemotherapy* 60(9):5198-5207.
32. Cox, J. A. G. *et al.* (2016) THPP target assignment reveals EchA6 as an essential fatty acid shuttle in mycobacteria. *Nature Microbiology* 1:15006.
33. Kelley, L. A., Mezulis, S., Yates, C. M., Wass, M. N. & Sternberg, M. J. E. (2015) The



- Phyre2 web portal for protein modeling, prediction and analysis. *Nature Protocols* 10(6):845-858.
34. Payne, K., Sun, Q., Sacchettini, J. & Hatfull, G. F. (2009) Mycobacteriophage Lysin B is a novel mycolylarabinogalactan esterase. *Molecular Microbiology* 73(3):367-381.
35. Deidda, D. *et al.* (1998) Bactericidal activities of the pyrrole derivative BM212 against multidrug-resistant and intramacrophagic *Mycobacterium tuberculosis* strains. *Antimicrobial Agents and Chemotherapy* 42(11):3035-3037.
36. Ozkan, P. & Mutharasan, R. (2002) A rapid method for measuring intracellular pH using BCECF-AM. *Biochimica et Biophysica Acta* 1572(1):143-148.
37. Li, K. *et al.* (2014) Multitarget drug discovery for tuberculosis and other infectious diseases. *Journal of Medicinal Chemistry* 57(7):3126-3139.
38. Laemmli, U. K. (1970) Cleavage of structural proteins during the assembly of the head of bacteriophage T4. *Nature* 227:680-685.

246

247

248 **Figure Legends**

249

250 **Fig. 1.** TMM biosynthesis is intact in mycobacterial spheroplasts. (A) A schematic diagram  
251 illustrating the processes important for MA transport across the cell envelope. Following  
252 synthesis, TMMs must be flipped across the IM, released from the IM and then transported  
253 across the periplasm (presumably via a chaperone). MmpL3 is implicated in TMM transport  
254 at the IM, but its exact role has not been elucidated. At the OM, the Ag85 complex transfers  
255 the mycolate chain from one TMM molecule to cell wall-linked arabinogalactan (AG)  
256 polysaccharides, or to another TMM molecule to form trehalose dimycolate (TDM). Other  
257 known lipid species found in the OM and IM are omitted for simplicity. PL, phospholipid. (B)  
258 TLC analysis of newly-synthesized [<sup>14</sup>C]-labelled lipids extracted from wild-type *M.*  
259 *smegmatis* cells (WC) and spheroplasts (SP), visualized by phosphor imaging. Lipids were  
260 radiolabelled in the presence or absence of isoniazid as indicated. The developing solvent  
261 system comprises chloroform-methanol-water (30:8:1). PE, phosphatidylethanolamine; CL,  
262 cardiolipin; PI, phosphatidylinositol; PIM, phosphatidylinositol mannoside.

263

264 **Fig. 2.** Newly-synthesized TMMs in mycobacterial spheroplasts are accessible to degradation  
265 by LysB, indicating that these TMMs reside in the outer leaflet of the IM. (A) TLC analyses  
266 of newly-synthesized [<sup>14</sup>C]-labelled lipids extracted from *M. smegmatis* spheroplasts treated  
267 with purified functional or non-functional (S82A) LysB. Lipids were resolved on TLCs  
268 developed using solvent systems comprising either chloroform-methanol-water (30:8:1) (*left*)  
269 or hexane-diethylether-acetic acid (70:30:1) (*right*), followed by visualization via phosphor

270 imaging. In addition to MA, treatment with functional LysB also resulted in the release of an  
271 unidentified apolar lipid, annotated with an asterisk (\*). TAG, triacylglycerol. (B)  $\alpha$ -GroEL2  
272 and  $\alpha$ -His immunoblot analyses of pellet and supernatant fractions obtained from  
273 sedimentation of *M. smegmatis* spheroplasts treated with functional or non-functional (S82A)  
274 LysB, indicating that LysB does not induce cell lysis.

275

276 **Fig. 3.** Anti-mycobacterial compounds, BM212 and AU1235, reduce TMM accessibility to  
277 LysB in spheroplasts, indicating inhibition of TMM flipping across the IM. (A, B)  
278 Representative TLC analyses of [ $^{14}$ C]-labelled lipids newly-synthesized in the presence of  
279 indicated concentrations of (A) BM212, AU1235, and (B) SQ109, and extracted from *M.*  
280 *smegmatis* spheroplasts following treatment with or without purified LysB. The effects of  
281 carbonyl cyanide *m*-chlorophenyl hydrazone (CCCP) and nigericin, which are known to  
282 disrupt the pmf, were also tested. At higher concentrations, these uncouplers affected lipid  
283 synthesis, consistent with the depletion of ATP. DMSO and methanol were used to dissolve  
284 the respective compounds and thus serve as negative controls. Equal amounts of radioactivity  
285 were spotted for each sample. The developing solvent system comprises  
286 chloroform-methanol-water (30:8:1). (C) A graphical plot showing the effects of various  
287 compounds on the amounts of TMMs remaining in spheroplasts following LysB treatment.  
288 TMM levels were quantified from TLCs shown in (A) and (B) expressed as a percentage of  
289 total mycolates (TMM+MA), and normalized against that in corresponding control samples  
290 without LysB treatment. Average normalized percentages and standard deviations from three

291 biological replicates are plotted. Student's t-test: \*,  $p < 0.05$  compared to the corresponding  
292 DMSO or methanol controls.

293

294 **Fig. 4.** Anti-mycobacterial compounds, BM212 and AU1235, reduce surface display of  
295 6-azido-TMMs in spheroplasts, indicating inhibition of TMM flipping across the IM. (A) A  
296 schematic diagram illustrating the 6-azido-TMM surface display assay. Spheroplasts were  
297 incubated with 6-azido-trehalose to allow synthesis of 6-azido-TMM (20), which were  
298 subsequently labelled with alkyne-containing biotin (DIBO-biotin) via click chemistry (21).  
299 Surface-exposed TMM-biotin molecules were then recognized by Alexa Fluor  
300 488-conjugated streptavidin, and visualized by fluorescence microscopy. (B-E)  
301 Representative bright-field and fluorescence microscopy images following  
302 DIBO-biotin/Alexa Fluor 488-streptavidin labelling of spheroplasts synthesizing (B) TMM,  
303 or 6-azido-TMM in the presence of (C) DMSO, (D) BM212 (2xMIC), and (E) AU1235  
304 (2xMIC). Scale bars = 3  $\mu\text{m}$ .

305

306 **Fig. 5.** Mutations in MmpL3 render BM212 less effective in the inhibition of TMM flipping  
307 across the IM. (A-C) Representative TLC analyses of [ $^{14}\text{C}$ ]-labelled lipids newly-synthesized  
308 in the presence of indicated concentrations of BM212, and extracted from (A) WT, (B)  
309 *mmpL3*<sub>V197M</sub>, and (C) *mmpL3*<sub>A326T</sub> *M. smegmatis* spheroplasts following treatment with or  
310 without purified LysB. DMSO serves as a negative control. Equal amounts of radioactivity  
311 were spotted for each sample. The developing solvent system comprises  
312 chloroform-methanol-water (30:8:1). (D) A graphical plot showing the dose-dependent

313 effects of BM212 on the amounts of TMMs remaining in the respective spheroplasts  
314 following LysB treatment. TMM levels were quantified from TLCs shown in (A-C) expressed  
315 as a percentage of total mycolates (TMM+MA), and normalized against that in corresponding  
316 control samples without LysB treatment. Average normalized percentages and standard  
317 deviations from three biological replicates are plotted. Student's t-test: \*,  $p < 0.05$ ; \*\*,  $p <$   
318  $0.01$  compared to the corresponding DMSO controls for each respective strain. (E-G)  
319 Representative bright-field and fluorescence microscopy images following  
320 DIBO-biotin/Alexa Fluor 488-streptavidin labelling of *mmpL3*<sub>V197M</sub> spheroplasts synthesizing  
321 (E) TMM, or 6-azido-TMM in the presence of (F) DMSO, and (G) BM212 (2xMIC). Scale  
322 bars = 3  $\mu\text{m}$ .

323

324 **Fig. 6.** Mutations that confer resistance against BM212 cluster on a structural model of  
325 MmpL3, suggesting a possible binding site. A phyre2 (33) structural model for *M. smegmatis*  
326 MmpL3 without its C-terminal cytoplasmic domain is shown in side- (*left*) and top-view  
327 (*right*) orientations. For clarity, periplasmic domains are removed from the top-view  
328 orientation. Residues important for passage of protons are highlighted in black. Residues that  
329 conferred resistance against BM212 (9) when mutated in MmpL3 from *M. smegmatis*, *M.*  
330 *bovis* BCG and *M. tuberculosis* are highlighted in red, purple and cyan, respectively.

331

332 **Figures**

333 **Figure 1**

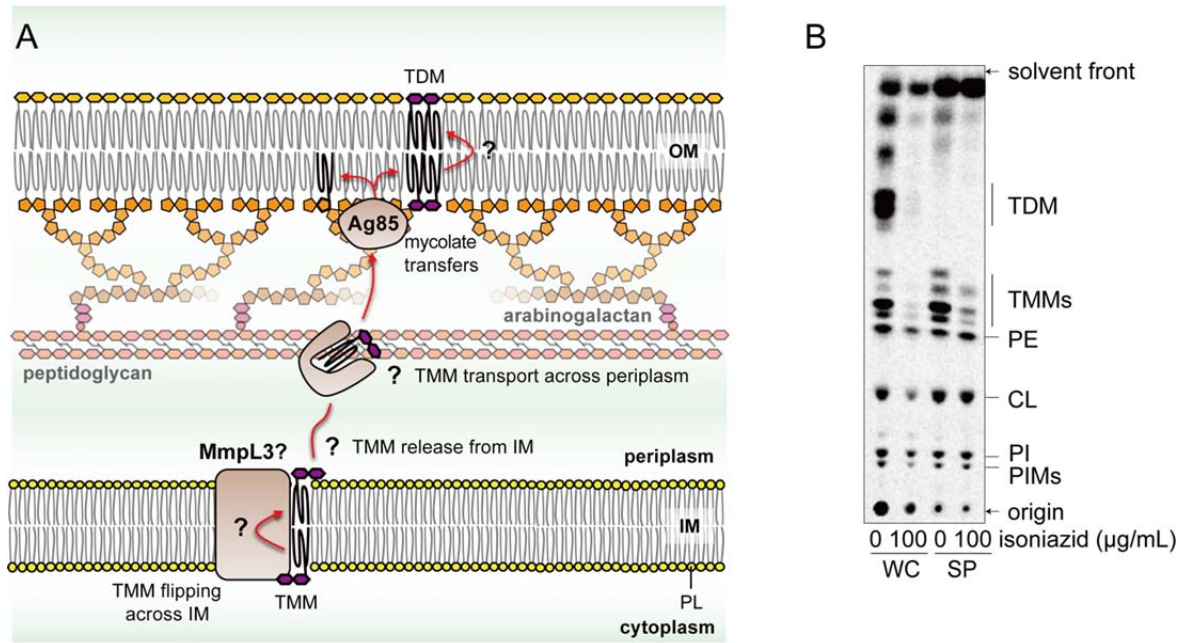

334

335

336 **Figure 2**

337

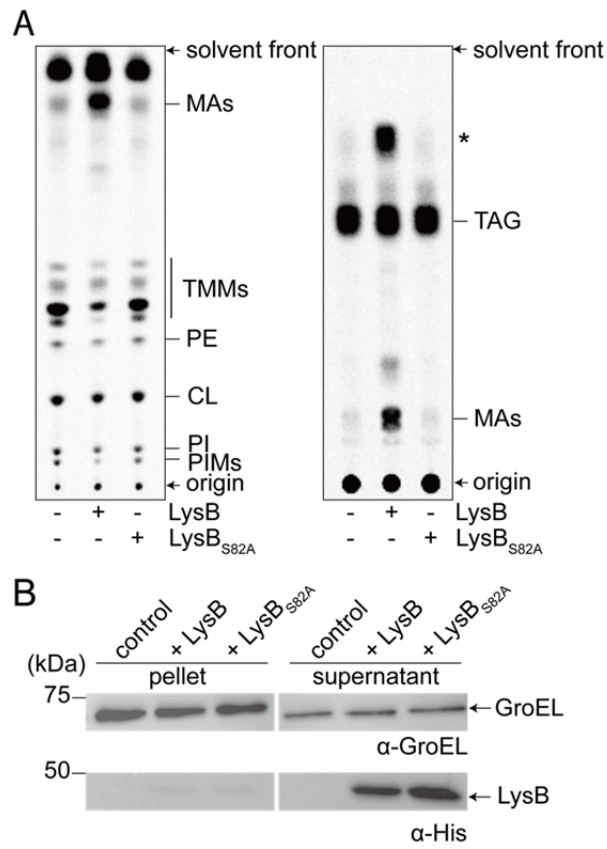

338

339

340 **Figure 3**

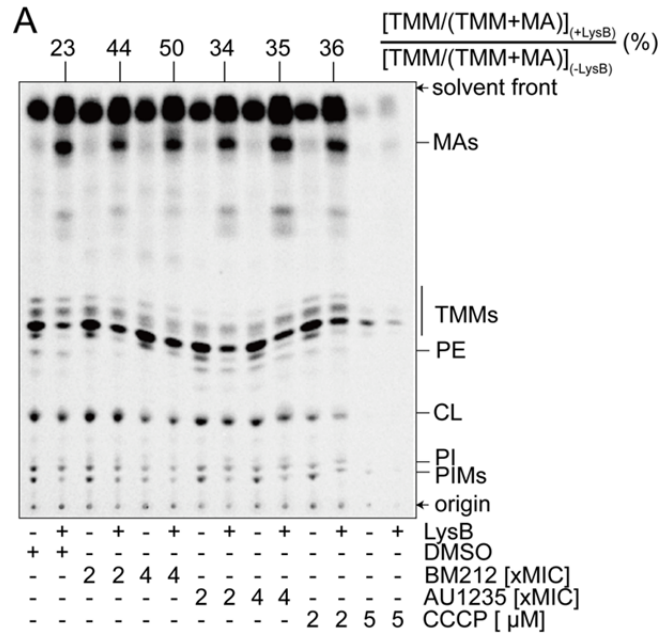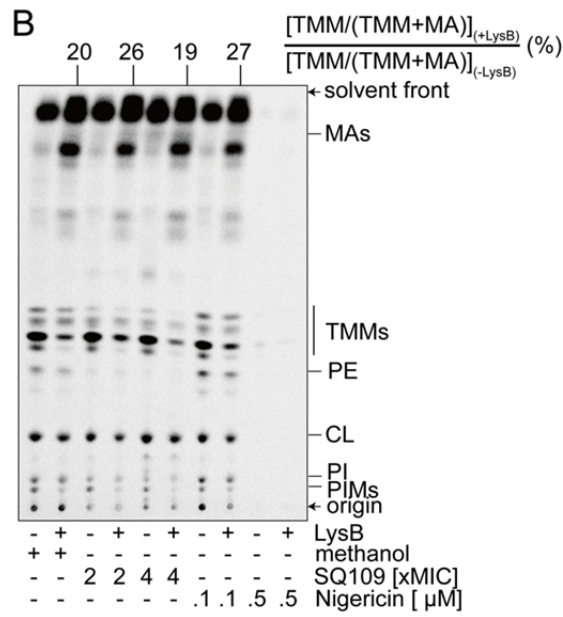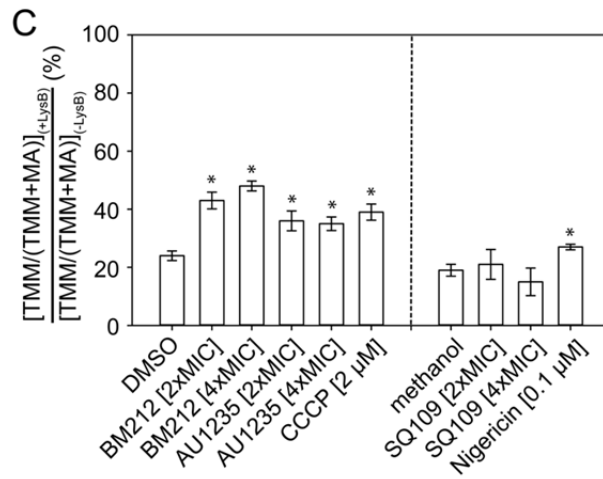

341



342 **Figure 4**

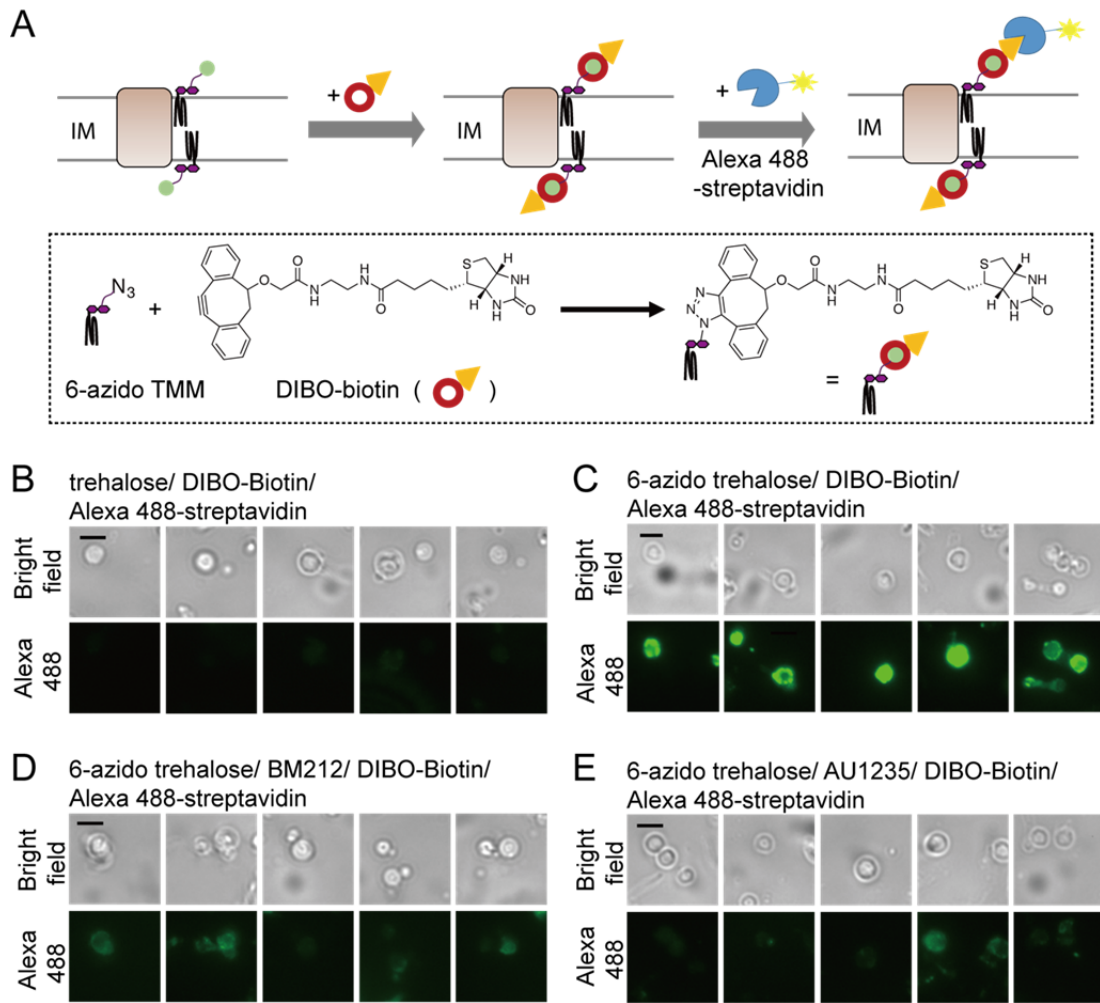

343

344

345 **Figure 5**

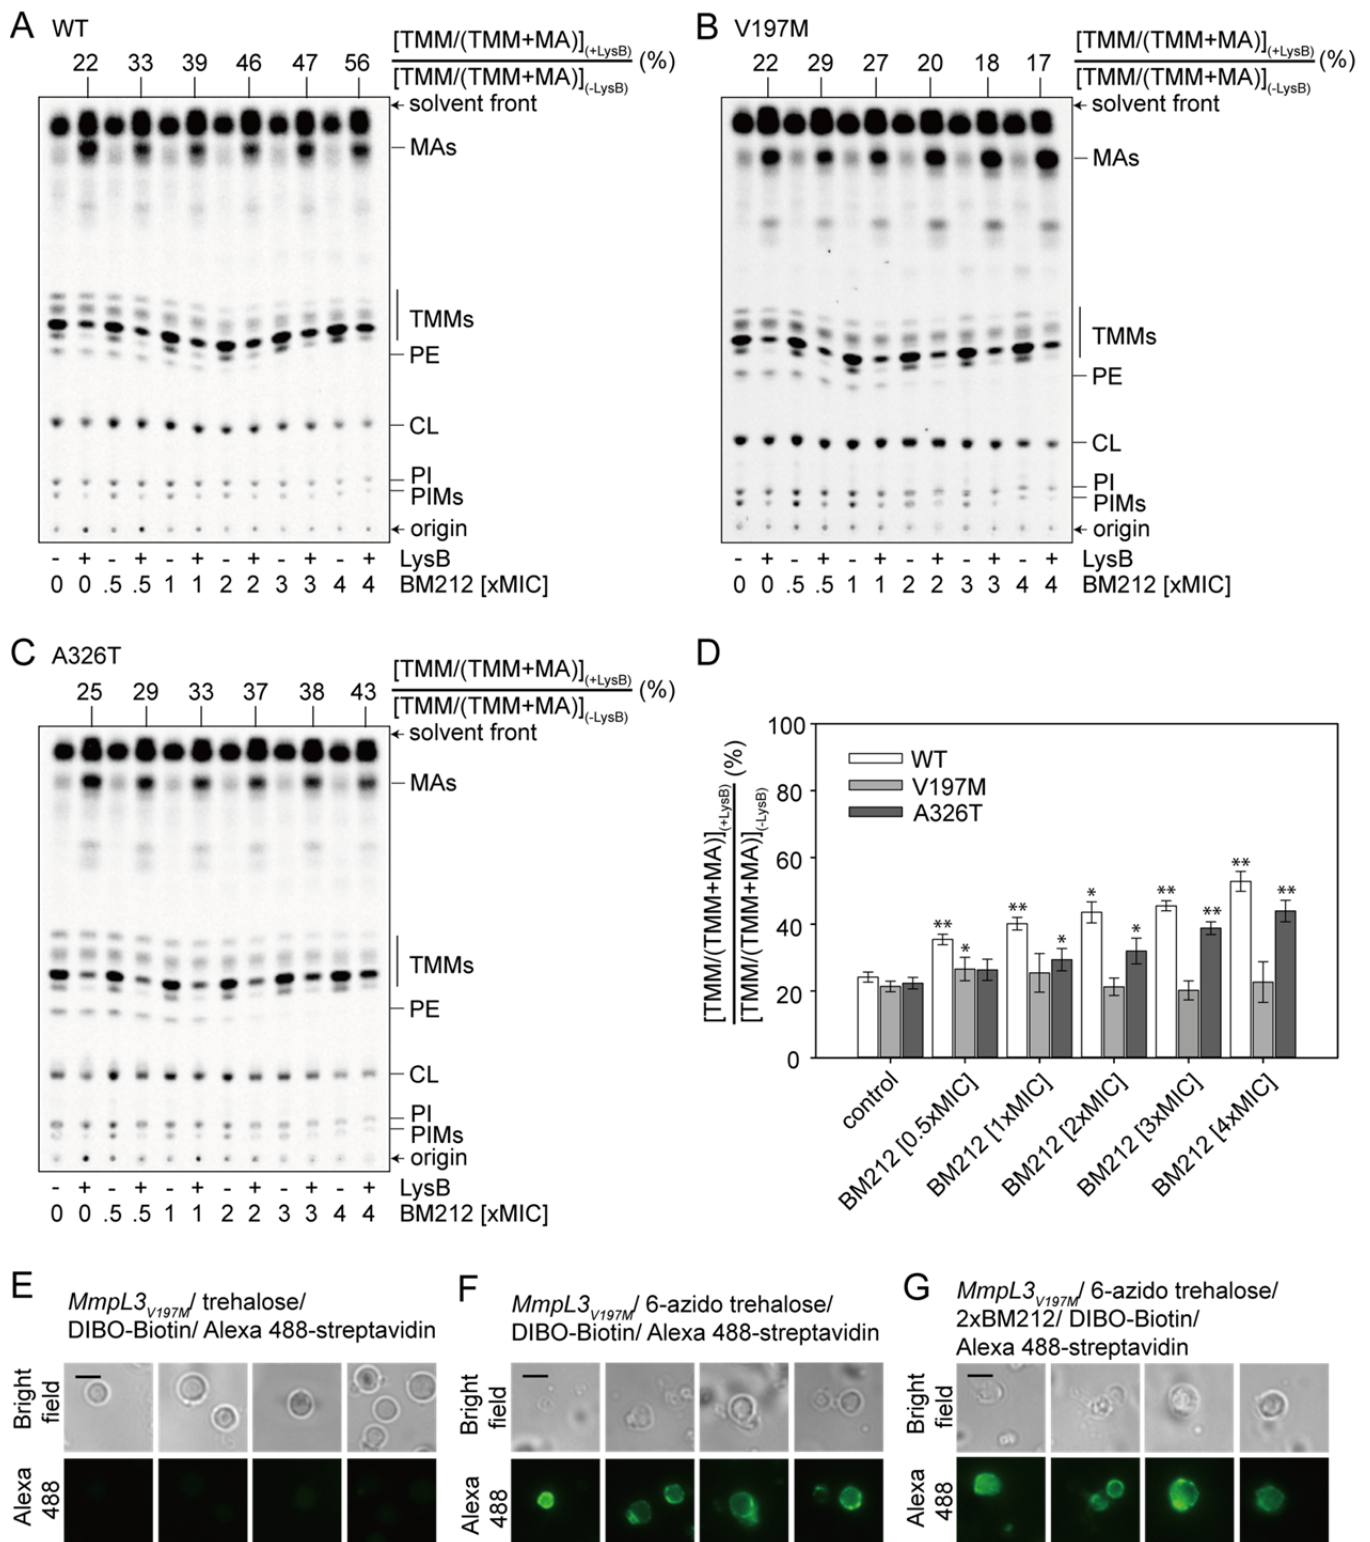

346

347 **Figure 6**

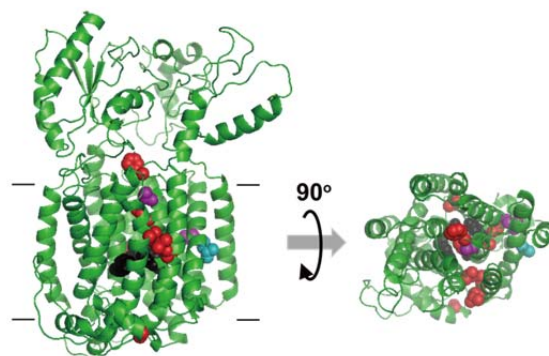

348

349

350 **Supplementary Information**

351

352 **Title:** MmpL3 is the flippase for mycolic acids in mycobacteria

353

354 **Authors:** Zhujun Xu<sup>a</sup>, Giovanna Poce<sup>c</sup>, Shu-Sin Chng<sup>a,b,\*</sup>

355

356 **Affiliations:**

357 <sup>a</sup>Department of Chemistry, National University of Singapore, Singapore 117543.

358 <sup>b</sup>Singapore Center on Environmental Life Sciences Engineering (SCELSE), National  
359 University of Singapore, Singapore 117456.

360 <sup>c</sup>Dipartimento di Chimica e Tecnologie del Farmaco, Sapienza University of Rome, Rome  
361 00185, Italy

362 \*To whom correspondence should be addressed. E-mail: [chmchngs@nus.edu.sg](mailto:chmchngs@nus.edu.sg)

363

364

365 **Supplementary Materials and Methods**

366

367 **Bacterial strains and growth conditions.** *M. smegmatis* mc<sup>2</sup>155 was used in all experiments  
368 unless otherwise noted. BM212-resistant *M. smegmatis* strains, SRBM212\_26 (*mmpL3*<sub>VI97M</sub>)  
369 and SRBM212\_20 (*mmpL3*<sub>A326T</sub>), were obtained from the Rubin laboratory at Harvard School  
370 of Public Health (9). For spheroplast formation, strains were grown in tryptic soy broth (TSB;  
371 BD Falcon) containing 1% glucose and 0.05% Tween 80 (16). For drug susceptibility tests,  
372 strains were grown in 7H9 broth (BD Falcon) containing 10% ADC enrichment (BD Falcon)  
373 and 0.05% Tween 80, or on 7H10 solid agar with 10% OADC enrichment (BD Falcon).  
374 *Escherichia coli* BL21(λDE3) was used for overexpression and purification of wild-type  
375 LysB and its non-functional LysB<sub>S82A</sub> variant from pLAM3 (pET24a(+)*lysB-His*) (34) and  
376 pET24a(+)*lysB*<sub>S82A</sub>-*His*, respectively.

377

378 **Chemicals.** BM212 was synthesized as previously reported (35). BM212 and AU1235 (JS  
379 Research Chemicals Trading) were solubilized in DMSO at 1 mg/ml and used as stock  
380 solutions. SQ109 (Vector Biomed) was solubilized in methanol at 1 mg/ml. CCCP  
381 (Sigma-Aldrich) was prepared as a 1-mM stock solution in DMSO. Nigericin (Sigma-Aldrich)  
382 was prepared as a 2-mM stock solution in methanol. Valinomycin (Sigma-Aldrich) was  
383 prepared as a 3-mM stock solution in ethanol.

384

385 **Spheroplast formation.** *M. smegmatis* cells were converted to spheroplasts as described by  
386 Rakesh K et al (16). Briefly, a vial of *M. smegmatis* mc<sup>2</sup>155 glycerol stock was thawed and

387 inoculated into TSB with 1% glucose and 0.05% Tween 80, followed by incubation at 37°C  
388 and 180 rpm until the optical density (OD<sub>600</sub>) reached ~1.0. Glycine was then added into the  
389 culture to a final concentration of 1.2% (w/v), followed by continued incubation at 37°C and  
390 120 rpm for 20 to 24 h. The glycine-treated cells were harvested by centrifugation at 4,000 x  
391 g, washed with 1xSMM buffer (final pH 6.8; 0.5 M sucrose and 20 mM MgCl<sub>2</sub> in 20 mM  
392 maleate buffer at pH 6.6), and re-suspended in TSB-SMM (TSB containing 1xSMM buffer)  
393 by gentle pipetting. Filter-sterilized solutions of lysozyme (5 mg/ml) and glycine (20% (w/v))  
394 were added to final concentrations of 50 µg/ml and 1.2% (w/v), respectively. Spheroplast  
395 formation was complete after incubation at 37°C and 120 rpm for another 20 to 24 h. The  
396 final mixture was washed with 1xSMM buffer and filtered through a sterile cell strainer (20  
397 µm; BD Falcon) to eliminate clumps of cells. The successful generation of *M. smegmatis*  
398 spheroplasts was confirmed by examining morphology changes in both bright-field and  
399 fluorescence (DAPI, FM14-3) images taken using an Olympus IX71 inverted microscope.

400

401 **Lipid profiling of *M. smegmatis* spheroplasts.** To label all lipids, *M. smegmatis* mc<sup>2</sup>155  
402 cells or spheroplasts (OD<sub>600</sub> = 0.8) were incubated for 2 h at 37°C in TSB or TSB-SMM (pH  
403 6.8), respectively, containing sodium [1-<sup>14</sup>C]-acetate (final concentration 0.2 µCi/ml; Perkin  
404 Elmer NEC084A001MC). Where indicated, 100 µg/ml isoniazid (Sigma-Aldrich) was added  
405 to inhibit mycolic acid synthesis prior to [<sup>14</sup>C]-labelling. Labelled cells or spheroplasts were  
406 harvested by centrifugation at 5,000 x g for 10 min, and lipids extracted as follows. Briefly,  
407 cell pellets (from 1-ml cultures at OD<sub>600</sub> = 0.8) were resuspended in 800-µl of single-phase  
408 chloroform-methanol-water (2:1:0.2) solution, followed by three repeats of alternating bath

409 sonication (1 min duration) and brief vortexing. Appropriate volumes of methanol and water  
410 were then added to give a two-phase chloroform-methanol-water (1:1:0.8) mixture, the  
411 sample vortexed, and then centrifuged at 10,000 x g for 5 min to achieve phase separation.  
412 The organic phases (bottom phase) containing lipids were collected and air-dried overnight in  
413 a fumehood. Lipids were analyzed by TLC, and visualized by phosphor imaging.

414

415 **Assessing TMM accessibility to degradation in spheroplasts by purified LysB.** To label  
416 all lipids, *M. smegmatis* mc<sup>2</sup>155 spheroplasts (OD<sub>600</sub> = 0.8) were incubated for 2 h at 37°C in  
417 1xSMM buffer (pH 6.8) containing sodium [<sup>14</sup>C]-acetate (final concentration 0.2 µCi/ml;  
418 Perkin Elmer NEC084A001MC). Following labelling, 1-ml spheroplast suspensions were  
419 aliquoted into separate microcentrifuge tubes and treated with purified LysB (50 µg/ml final  
420 concentration), purified inactive LysB<sub>S82A</sub>, or no LysB for 30 min at 37°C. Treated  
421 spheroplasts were harvested by centrifugation at 5,000 x g for 10 min. Lipids were extracted  
422 according to the procedure outlined in the “Lipid profiling” section, analyzed by TLC, and  
423 visualized by phosphor imaging. To test the effects of putative MmpL3 inhibitors in this assay,  
424 spheroplasts were pre-treated (prior to labelling) with indicated concentrations of compounds,  
425 including BM212, AU1235, SQ109 and valinomycin (in presence of 100 mM KCl), and  
426 incubated for 15 min at 37°C. DMSO, methanol and ethanol were used as negative controls  
427 (depending on the solvent used to solubilize each compound), while CCCP and nigericin  
428 were used as positive controls.

429 To examine if selected compounds (BM212 and AU1235) affected the activity of  
430 LysB, samples were treated with DDM (final concentration 0.02% (w/v)) to lyse spheroplasts

431 after radiolabeling and prior to LysB treatment. Following LysB treatment, lipids were  
432 extracted from the whole solution with a slightly modified procedure. Appropriate volumes of  
433 chloroform and methanol were added to the ~1-ml solution to give a single-phase  
434 chloroform-methanol-water (1:2:0.8) solution. The sample was then subjected to five repeats  
435 of alternating bath sonication (2 min duration) and brief vortexing (10 s). The final solution  
436 was converted to a two-phase chloroform-methanol-water (1:1:0.8) mixture by adding  
437 appropriate volumes of chloroform and water, vortexed and finally centrifuged at 4,000 x *g*  
438 for 30 min to achieve phase separation. The organic phases (bottom phase) containing lipids  
439 were collected and air-dried overnight in a fumehood. Lipids were analyzed by TLC, and  
440 visualized by phosphor imaging.

441 To test if treatment with LysB resulted in lysis of spheroplasts, mock reactions not  
442 containing radioactive sodium acetate were set up so as to examine cytoplasmic protein  
443 localization after cell fractionation. *M. smegmatis* mc<sup>2</sup>155 spheroplasts (OD<sub>600</sub> = 0.8) were  
444 incubated for 2 h at 37°C in 1xSMM buffer (pH 6.8) containing sodium acetate (final  
445 concentration 18 µg/ml). 1-ml spheroplast suspensions were then aliquoted into separate  
446 microcentrifuge tubes and treated with purified LysB (50 µg/ml final concentration), purified  
447 inactive LysB<sub>S82A</sub>, or no LysB for 30 min at 37°C. Treated spheroplasts were centrifuged at  
448 5,000 x *g* for 10 min to separate cell pellets and supernatants. Pellets were washed twice and  
449 resuspended in 1-ml 1xSMM buffer. Supernatants were further purified by two sequential  
450 centrifugation steps (10,000 x *g*, 10 min) to remove residual spheroplasts. 100 µl from both  
451 pellet and supernatant samples were mixed separately with equal volumes of 2x Laemmli  
452 SDS-PAGE reducing sample buffer, and boiled at 100°C for 10 min. Equal volumes of all



453 samples were then subjected to SDS-PAGE, followed by immunoblotting using antibodies  
454 against GroEL2 (cytoplasmic protein) and the penta-histidine tag (to detect LysB-His).

455

456 **Thin layer chromatography.** All dried radiolabeled lipid samples were suspended in 100  $\mu$ l  
457 chloroform-methanol (4:1). Equal volumes (20  $\mu$ l) of samples were mixed with 2 ml of  
458 Ultima Gold scintillation fluid (Perkin Elmer, Singapore). The [ $^{14}$ C]-counts were measured  
459 using scintillation counting (MicroBeta2<sup>®</sup>, Perkin-Elmer) and taken as the levels of total  
460 lipids isolated from the spheroplasts. Equal amounts (~5,000 cpm) of radioactivity were  
461 spotted on Silica 60 F<sub>254</sub> TLC plates (Merck). TLCs were developed in chambers  
462 pre-equilibrated for 30 min with solvent systems chloroform-methanol-water (30:8:1) or  
463 hexane-diethylether-acetic acid (70:30:1), where indicated. After development, TLC plates  
464 were air-dried for 2 hours and later visualized by phosphor imaging (STORM, GE healthcare).  
465 Densitometric analyses of TMM and MA spots for each lane (sample) on the phosphor  
466 images of TLCs were carried out using ImageQuant TL analysis software (version 7.0, GE  
467 Healthcare).

468

469 **Overexpression and purification of D29 mycobacteriophage LysB and its inactive**  
470 **variant.** BL21( $\lambda$ DE3) containing pLAM3 (pET24a(+)*lysB-His*) (34) or  
471 pET24a(+)*lysB<sub>S82A</sub>-His* were used for overexpression and purification of wild-type LysB or  
472 its non-functional LysB<sub>S82A</sub> variant, respectively. pLAM3 was a kind gift from Graham  
473 Hatfull (University of Pittsburgh). pET24a(+)*lysB<sub>S82A</sub>-His* was constructed from pLAM3 via  
474 site-directed mutagenesis. For each strain, 30-ml small culture was first grown from single

475 colony in LB broth (supplemented with 200 µg/ml ampicillin) at 37°C until OD<sub>600</sub> ~0.5-0.7.  
476 A 3-l culture was then inoculated using the small culture at 1:100 dilution and grown in LB  
477 broth at 37°C until OD<sub>600</sub> ~0.5-0.7. Isopropyl β-D-1-thiogalactopyranoside (IPTG; 1st Base)  
478 was subsequently added to large cultures to get a final concentration of 1 mM. After  
479 incubation at 37°C for 2 h, cells were harvested by centrifugation at 4,700 x g for 20 min.  
480 Pelleted cells were resuspended in 20 ml of cold buffer A (20 mM Tris HCl, pH 8.0, 150 mM  
481 NaCl) containing 100 µg/ml lysozyme, 100 µM phenylmethylsulfonyl fluoride (PMSF) and  
482 50 µg/ml DNase I. The re-suspended cells were lysed by a single passage through a high  
483 pressure French Press (French Press G-M, Glen Mills) homogenizer at 20,000 psi. Unbroken  
484 cells were removed by centrifugation at 5,000 x g for 10 min. The cell lysate was collected  
485 and centrifuged at 100,000 x g for 1 h in an ultracentrifuge (Model XL-90, Beckman Coulter)  
486 to remove membrane debris. The supernatant was collected, loaded onto a column packed  
487 with 2.5 mL of TALON cobalt resin (Clontech) pre-equilibrated with 25 mL of buffer B (50  
488 mM Tris HCl, 300 mM NaCl, 10 mM imidazole, pH 8.0), and incubated at 4°C for 1 h with  
489 rocking. The resin mixture was later allowed to drain by gravity. The filtrate was collected,  
490 reloaded into the column and drained as above. The resin was washed with 4 x 25 ml buffer  
491 B, and then eluted with 10 ml of buffer C (50 mM Tris HCl, 150 mM NaCl, 200 mM  
492 imidazole, pH 8.0). The eluate was concentrated in a 10 kDa cut-off ultra-filtration device  
493 (Amicon Ultra, Merck Millipore) by centrifugation at 4,000 x g to ~250 µl. The concentrated  
494 samples were further purified by size exclusive chromatography on an AKTA Pure machine  
495 using a prepacked Superdex 75 column (GE Healthcare) with TBS as the eluent. The  
496 concentrations of purified LysB and LysB<sub>S82A</sub> were determined using the DC™ protein assay

497 (Bio-Rad).

498

499 **6-azido-TMM surface display assay.** 1-ml of *M. smegmatis* spheroplasts (OD = 0.8) in  
500 1xSMM buffer was fed with 100  $\mu$ M 6-azido-trehalose (a kind gift of Benjamin Swarts  
501 (Central Michigan U)) at 37°C for 2 h to allow the biosynthesis of 6-azido-TMM(20). The  
502 same concentration of trehalose was employed for spheroplasts used as a negative control.  
503 Spheroplasts were washed twice with 1xSMM buffer, resuspended in 1 ml of the same buffer,  
504 and then incubated at room temperature with Click-IT<sup>®</sup> Biotin DIBO Alkyne (final 5  $\mu$ g/ml;  
505 ThermoFisher Scientific product no. C10412) for 1 hour in the dark. This step labels all  
506 6-azido-TMMs via click chemistry to afford biotin-TMMs. Following this, spheroplasts were  
507 again washed thrice with 1xSMM buffer and resuspended in 1 ml of the same buffer. To  
508 specifically label surface-exposed biotin-TMMs, Alexa Fluor<sup>®</sup> 488 streptavidin (final 1  $\mu$ g/ml;  
509 ThermoFisher Scientific product no. S32354) was added to the spheroplasts and incubated for  
510 1 hour at room temperature in the dark. Following three washes with 1xSMM buffer, the  
511 spheroplasts were re-suspended in 50  $\mu$ l 1xSMM buffer. 10  $\mu$ l of each sample was spotted  
512 onto a microscope glass slide. Bright-field and fluorescence ( $\lambda_{\text{ex}}$  488 nm/  $\lambda_{\text{em}}$  525 nm) images  
513 were captured on an Olympus IX71 inverted microscope using an Photometrics CoolSNAP  
514 HQ<sup>2</sup> camera and SoftWoRx 4.10 software (MBI NUS). To test the effects of putative MmpL3  
515 inhibitors in this assay, spheroplasts were pre-treated (prior to labelling with  
516 6-azido-trehalose) with indicated concentrations of compounds, including BM212 and  
517 AU1235, and incubated for 15 min at 37°C. In addition, all wash buffers contained the same  
518 concentrations of these compounds. DMSO was used as a negative control.

519

520 **Determination of intracellular pH using the**  
521 **2',7'-bis-(2-carboxyethyl)-5-(and-6)-carboxyfluorescein acetoxymethyl ester**  
522 **(BCECF-AM) dye.** The effects of inhibitors on  $\Delta\text{pH}$  were determined using BCECF, a  
523 pH-sensitive fluorescent dye activated inside cells via esterase-mediated hydrolysis of  
524 BCECF-AM (36). First, a standard curve was generated as follows. Briefly, *M. smegmatis*  
525 spheroplasts (OD = 0.8) in 1xSMM buffers at various pHs (6.0 - 8.0) were incubated with 20  
526  $\mu\text{M}$  BCECF-AM at 37°C for 30 min in the presence of 20  $\mu\text{M}$  nigericin. Nigericin is a proton  
527 uncoupler and serves to allow equilibration of protons (pH) across the membrane. The buffers  
528 also contained 100 mM potassium chloride (KCl), presumably to ensure a steady membrane  
529 potential ( $\Delta\psi$ ). Fluorescence emission ( $\lambda_{\text{em}}$  525 nm) intensities of intracellular BCECF were  
530 measured following excitation at  $\lambda_{\text{ex}}$  488 and 440 nm in a SPECTRAMax 250 microplate  
531 spectrophotometer equipped with SOFTmax PRO software (Molecular Devices). The ratio of  
532 fluorescence emission intensities at these two excitation wavelengths, or the fluorescence  
533 excitation profile ( $\lambda_{\text{ex}}$  488 nm/ $\lambda_{\text{ex}}$  440 nm), is pH-dependent. Average ( $\lambda_{\text{ex}}$  488 nm/ $\lambda_{\text{ex}}$  440 nm)  
534 values were obtained from technical triplicates and plotted against pH to obtain a linear  
535 standard curve (Extended Data Fig. 6).

536 To test the effects of putative MmpL3 inhibitors on intracellular pH (and hence  $\Delta\text{pH}$ ),  
537 spheroplasts (OD = 0.8) in 1xSMM buffer at pH 6.8 were pre-treated with indicated  
538 concentrations of compounds, including BM212, AU1235 and SQ109, and incubated at 37°C  
539 for 30 min. DMSO and methanol were used as negative controls, while CCCP and nigericin  
540 were used as positive controls. 20  $\mu\text{M}$  BCECF-AM was then added to the samples and

541 incubation was continued for 30 min before fluorescence measurements. Fluorescence  
542 excitation profiles ( $\lambda_{\text{ex}}$  488 nm/ $\lambda_{\text{ex}}$  440 nm) of BCECF for each condition were averaged  
543 (across three technical replicates) and calibrated against the standard curve. The intracellular  
544 pH and  $\Delta\text{pH}$  are tabulated in Extended Data Table 2.

545

546 **Membrane potential measurements in *M. smegmatis* spheroplasts.** The effects of  
547 inhibitors on  $\Delta\psi$  were determined using the membrane potential-sensitive  
548 3,3'-dipropylthiodicarbocyanine (DiSC<sub>3</sub>(5)) dye (37). DiSC<sub>3</sub>(5) binds to energized  
549 membranes and becomes quenched. When  $\Delta\psi$  is disrupted, the dye leaves the membrane,  
550 resulting in an increase in fluorescence. 1.5-ml *M. smegmatis* spheroplasts (OD =0.8) were  
551 used in 1xSMM buffer containing 10 mM glucose and 1  $\mu\text{M}$  nigericin (added to remove the  
552 effects of  $\Delta\text{pH}$ ). DiSC<sub>3</sub>(5) was then added to samples to get a final concentration of 5  $\mu\text{M}$  and  
553 equilibrated for 10 min at room temperature. From this point, fluorescence was continuously  
554 monitored with a SPECTRAMax 250 microplate spectrophotometer equipped with SOFTmax  
555 PRO software (Molecular Devices), employing an excitation wavelength of 643 nm and an  
556 emission wavelength of 666 nm. The effects of various compounds, including BM212 and  
557 AU1235, on  $\Delta\psi$  were measured by monitoring increase in fluorescence when these  
558 compounds were added at specific time points at indicated concentrations. DMSO and  
559 valinomycin (with potassium chloride) were used as positive and negative controls,  
560 respectively.

561

562 **Drug susceptibility tests.** MICs of compounds against various *M. smegmatis* strains were

563 determined using both solid and liquid media (10). For assays performed with solid media,  
564 7H10 agar medium supplemented with 10% OADC and 0.5% glycerol was used to prepare  
565 plates containing 2-fold serial dilutions of indicated compounds at concentrations ranging  
566 from 0.78 to 50  $\mu\text{g/ml}$ . Cell cultures were grown to mid-log growth phase ( $\text{OD} \sim 0.5\text{-}0.8$ ) in  
567 7H9 broth and diluted to a final concentration of  $\sim 2 \times 10^6$  cells/ml. One microliter of the  
568 diluted culture was then streaked onto each plate and incubated at  $37^\circ\text{C}$  for 3 to 4 days. The  
569 MIC was defined as the lowest concentration of compound that prevented the formation of  
570 colonies.

571 For assays performed with liquid media, the MIC was defined as the lowest  
572 concentration of compound that inhibited growth. Mycobacteria was inoculated at an  $\text{OD}_{600}$   
573 of 0.003 in wells with 200  $\mu\text{l}$  7H9 media containing 2-fold serial dilutions of indicated  
574 compounds at concentrations ranging from 0.78 to 50  $\mu\text{g/ml}$ , and incubated at  $37^\circ\text{C}$  for 24 h.  
575 50  $\mu\text{l}$  of a 1 mg/ml solution of MTT (Thiazolyl Blue Tetrazolium Bromide, Sigma) in sterile  
576 water was added to each well. Samples were then incubated at room temperature for 2 hours  
577 and color changes reflecting active metabolism (live cells) were monitored.

578

579 **SDS-PAGE and Western blots.** SDS-PAGE was performed according to Laemmli using the  
580 4-12% Tris.HCl polyacrylamide gels (38). Immunoblotting was performed by transferring  
581 protein bands from SDS-PAGE gels onto polyvinylidene fluoride (PVDF) membranes  
582 (Immun-Blot® 0.2  $\mu\text{m}$ , Bio-Rad) using the semi-dry electroblotting system (Trans-Blot®  
583 Turbo™ Transfer System, Bio-Rad). Membranes were blocked by 1x casein blocking buffer  
584 (Sigma).  $\alpha$ -His antibody (penta-histidine) conjugated to the horseradish peroxidase (HRP)

585 (Qiagen) was used at a dilution of 1:5,000. Mouse monoclonal  $\alpha$ -GroEL2 antibody (BEI  
586 Resources) was used at 1:1,000 dilution. Sheep  $\alpha$ -mouse IgG secondary antibody conjugated  
587 to HRP (GE Healthcare) was used at 1:5,000 dilution. Luminata Forte Western HRP Substrate  
588 (Merck Milipore) was used and chemiluminescent signals were visualized using the G:BOX  
589 Chemi XT 4 (Genesys version 1.3.4.0, Syngene).

590 **Supplementary Figure Legends**

591

592 **Fig. S1 *M. smegmatis* spheroplasts are successfully generated after treatment with**  
593 **glycine and lysozyme.** Cellular morphologies of *M. smegmatis* cells and spheroplasts  
594 visualized by light and fluorescence microscopy after labelling with membrane and DNA  
595 dyes, FM14-3 and DAPI, respectively. Scale bar = 3  $\mu\text{m}$ .

596

597 **Fig. S2 BM212 and AU1235 do not affect the activity of LysB.** Representative TLC  
598 analysis of [ $^{14}\text{C}$ ]-labelled lipids newly-synthesized in the presence of indicated concentrations  
599 of BM212 and AU1235, and extracted from *M. smegmatis* spheroplasts following treatment  
600 with or without purified LysB. Where indicated, n-dodecyl- $\beta$ -maltoside (DDM) was added to  
601 solubilize spheroplasts immediately prior to LysB addition. DMSO was used to dissolve the  
602 compounds and thus serve as negative controls. Equal amounts of radioactivity were spotted  
603 for each sample. The developing solvent system comprises chloroform-methanol-water  
604 (30:8:1). TMM levels in samples with LysB treatment were quantified from the TLC,  
605 expressed as a percentage of total mycolates (TMM+MA), and normalized against that in  
606 corresponding control samples without LysB treatment. FA, fatty acid.

607

608 **Fig. S3 Membrane potential ( $\Delta\psi$ ) is not required for TMM flipping across the IM.**  
609 Representative TLC analysis of [ $^{14}\text{C}$ ]-labelled lipids newly-synthesized in the presence of  
610 increasing concentrations of valinomycin (a potassium ionophore), and extracted from *M.*  
611 *smegmatis* spheroplasts following treatment with or without purified LysB. Ethanol was used



612 to dissolve valinomycin and thus serve as a negative control. Equal amounts of radioactivity  
613 were spotted for each sample. The developing solvent system comprises  
614 chloroform-methanol-water (30:8:1). TMM levels in samples with LysB treatment were  
615 quantified from the TLC, expressed as a percentage of total mycolates (TMM+MA), and  
616 normalized against that in corresponding control samples without LysB treatment.

617

618 **Fig. S4 Standard curve for intracellular pH measurements using the BCECF dye (36).**

619 The non-fluorescent BCECF acetoxymethyl ester (BCECF-AM) dye is used to measure  
620 intracellular pH. Upon entering spheroplasts, BCECF-AM is hydrolyzed by esterases to  
621 liberate BCECF, which is now fluorescent. The fluorescence excitation profile ( $\lambda_{\text{ex}}$  488  
622 nm/ $\lambda_{\text{ex}}$  440 nm) of BCECF is pH-dependent and varies linearly in the range of pH 6 to 8.  
623 Average ( $\lambda_{\text{ex}}$  488 nm/ $\lambda_{\text{ex}}$  440 nm) values and standard deviations from technical triplicates are  
624 plotted.

625

626 **Fig. S5 BM212 and AU1235 have minimal effects on the membrane potential ( $\Delta\psi$ ) in *M.***

627 *smegmatis* spheroplasts. Fluorescence intensity changes of 3,3'-dipropylthiadicarbocyanine  
628 iodide (DiSC<sub>3</sub>(5)) dye in spheroplasts upon the addition of specified concentrations of  
629 BM212 and AU1235 at the indicated time points. DiSC<sub>3</sub>(5) binds to energized membranes  
630 and becomes quenched. When  $\Delta\psi$  is disrupted, the dye leaves the membrane, resulting in an  
631 increase in fluorescence. Valinomycin-K<sup>+</sup> and DMSO serve as positive and negative controls,  
632 respectively.

633

634 **Supplementary Figures**

635 **Figure S1**

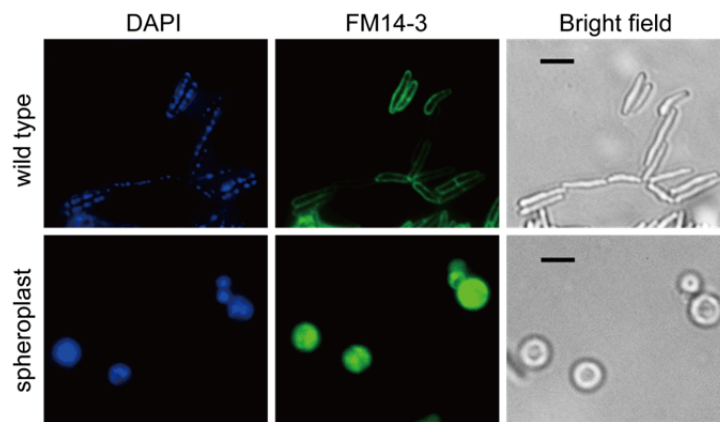

636  
637

638 **Figure S2**

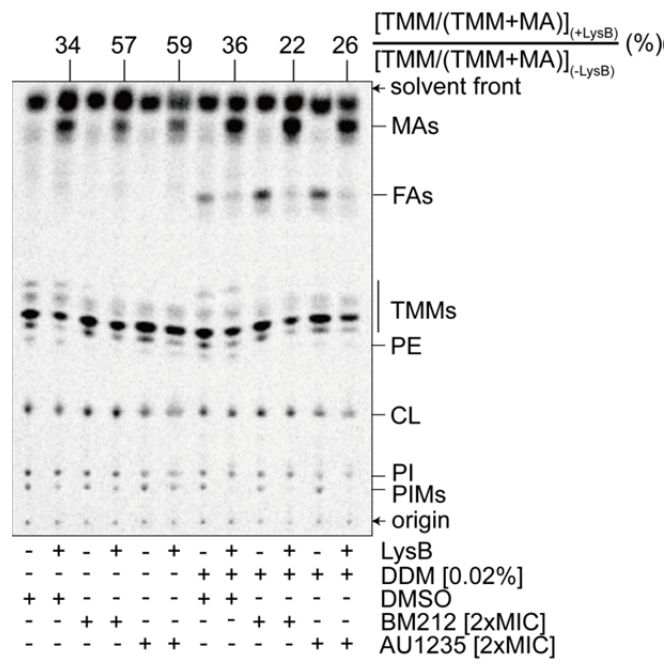

639

640

641 **Figure S3**

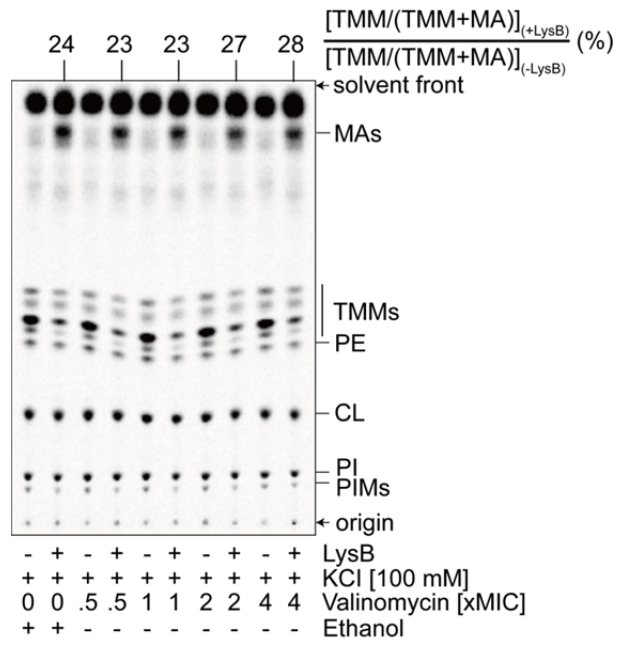

642

643

644 **Figure S4**

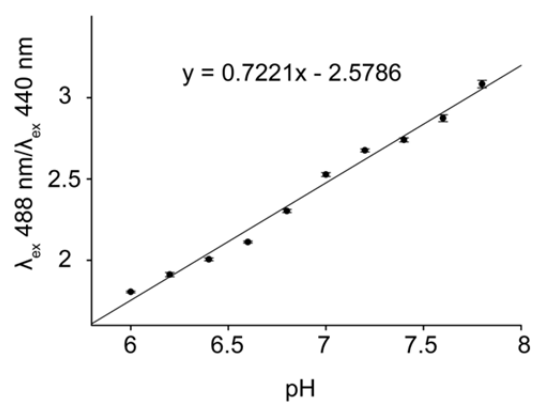

645

646

647 **Figure S5**

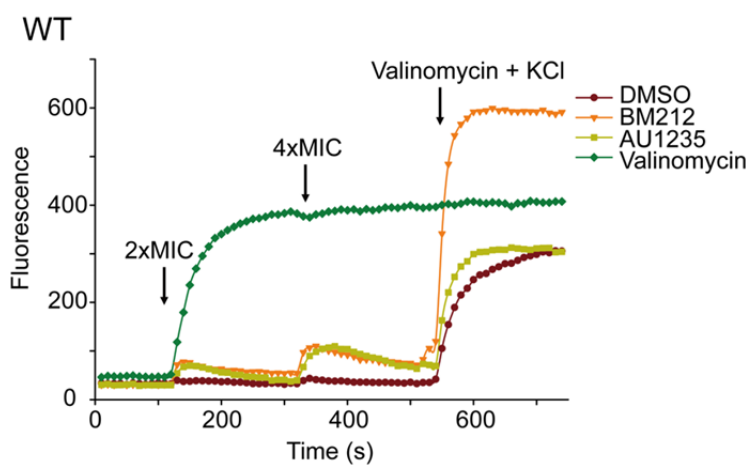

648

649 **Supplementary Tables**

650

651 **Table S1. Reported and measured minimal inhibitory concentrations (MICs) of various**  
652 **compounds against indicated *M. smegmatis* strains.**

| Strain                        | MIC ( $\mu\text{g/ml}$ ) |        |       |          |        |       |          |        |
|-------------------------------|--------------------------|--------|-------|----------|--------|-------|----------|--------|
|                               | BM212                    |        |       | AU1235   |        |       | SQ109    |        |
|                               | reported                 | liquid | solid | reported | liquid | solid | reported | liquid |
| WT                            | 3.125                    | 3.125  | 3.125 | 3.125    | 3.125  | 3.125 | 3.125    | 3.125  |
| <i>mmpL3</i> <sub>V197M</sub> | 25                       | 12.5   | 12.5  | -        | -      | -     | -        | -      |
| <i>mmpL3</i> <sub>A326T</sub> | 25                       | 12.5   | 12.5  | -        | -      | -     | -        | -      |

653

654

655 **Table S2. BM212, AU1235 and SQ109 do not affect the  $\Delta$ pH across the IM in**  
656 ***M. smegmatis* spheroplasts.**

| Drug                  | pH <sub>outside</sub> <sup>*</sup> | pH <sub>inside</sub> <sup>†</sup> | $\Delta$ pH <sup>‡</sup> |
|-----------------------|------------------------------------|-----------------------------------|--------------------------|
| DMSO                  | 6.80                               | 7.21 ( $\pm$ 0.02)                | 0.41 ( $\pm$ 0.02)       |
| BM212 (2xMIC)         | 6.80                               | 7.12 ( $\pm$ 0.02)                | 0.32 ( $\pm$ 0.02)       |
| BM212 (4xMIC)         | 6.80                               | 7.25 ( $\pm$ 0.06)                | 0.45 ( $\pm$ 0.06)       |
| AU1235 (2xMIC)        | 6.80                               | 7.11 ( $\pm$ 0.02)                | 0.31 ( $\pm$ 0.02)       |
| AU1235 (4xMIC)        | 6.80                               | 7.06 ( $\pm$ 0.01)                | 0.26 ( $\pm$ 0.01)       |
| 2 $\mu$ M CCCP        | 6.80                               | 6.74 ( $\pm$ 0.01)                | -0.06 ( $\pm$ 0.01)      |
| 5 $\mu$ M CCCP        | 6.80                               | 6.65 ( $\pm$ 0.02)                | -0.15 ( $\pm$ 0.02)      |
| methanol              | 6.80                               | 7.08 ( $\pm$ 0.03)                | 0.28 ( $\pm$ 0.03)       |
| SQ109 (2xMIC)         | 6.80                               | 7.47 ( $\pm$ 0.28)                | 0.67 ( $\pm$ 0.28)       |
| SQ109 (4xMIC)         | 6.80                               | 7.28 ( $\pm$ 0.01)                | 0.48 ( $\pm$ 0.01)       |
| 0.1 $\mu$ M Nigericin | 6.80                               | 7.18 ( $\pm$ 0.02)                | 0.38 ( $\pm$ 0.02)       |
| 0.5 $\mu$ M Nigericin | 6.80                               | 6.89 ( $\pm$ 0.02)                | 0.09 ( $\pm$ 0.02)       |

657 <sup>\*</sup> refers to pH of external buffer.

658 <sup>†</sup> intracellular pH obtained using the 2',7'-bis-(2-carboxyethyl)-5-(and-6)-carboxyfluorescein  
659 (BCECF) dye. Measurements of the fluorescence excitation profile ( $\lambda_{\text{ex}}$  488 nm/ $\lambda_{\text{ex}}$  440 nm) of  
660 BCECF were averaged (across the three technical replicates) and calibrated against a standard  
661 curve (Supplementary Fig. 4). Standard deviations are given in parenthesis.

662 <sup>‡</sup> pH<sub>inside</sub> - pH<sub>outside</sub>.

663
